# Supplementary material
Source: MDPI journal article supplement (https://www.mdpi.com/2673-592X/4/1/5)
Supplement: s1 [file s1]

**Supplementary Table S1.** Anonymized clinical characteristics of interest as reported in patient notes from institutional database.

| Patient | CR/PR | Age | Sex | Laterality | Biopsy description of disease                          | Location (Primary Mass)                                                | HPV Status    | Stage        | Lymph Node       | Chemotherapy Type      | Radiation regimen    | Smoking Habit                    | Alcohol Consumption                                             |
|---------|-------|-----|-----|------------|--------------------------------------------------------|------------------------------------------------------------------------|---------------|--------------|------------------|------------------------|----------------------|----------------------------------|-----------------------------------------------------------------|
| 1       | PR    | 52  | M   | Right Neck | Loc. Adv. Squamous cell                                | Base of Tongue                                                         | P16+          | T3 N2c       | Level III        | Cisplatin              | 70gy 33 fractions    | lifetime non smoker              | occasional drinker                                              |
| 2       | PR    | 54  | M   | Left Neck  | EBV positive non-keratinizing Nasopharyngeal Carcinoma | Nasopharynx                                                            | Unknown       | not reported | Level II         | Cisplatin              | 70gy 33 fractions    | lifetime non smoker              | occasional drinker                                              |
| 4       | PR    | 54  | M   | Right Neck | Squamous cell                                          | Right tonsil                                                           | p16+          | cT2 N2b      | Level II         | Cisplatin              | 70gy 33 fractions    | 30-pack year                     | occasional drinker                                              |
| 5       | CR    | 59  | M   | Left Neck  | Squamous cell                                          | Left Tonsil                                                            | p16+          | cT1 N2b      | Level II         | Cisplatin              | 70gy 33 fractions    | non smoker                       | non-drinker                                                     |
| 6       | CR    | 82  | M   | Left Neck  | small-cell carcinoma                                   | Left Parotid                                                           | Not reported  | Not reported | Level II         | Carboplatin+ Etoposide | 70gy 33 fractions    | Not reported                     | Not reported                                                    |
| 7       | PR    | 76  | M   | Left Neck  | metastatic Squamous cell                               | Bilateral Hypopharynx / Supraglottic Base of Tongue                    | p16+          | T2 N2b       | Level IIa        | Carboplatin            | 70gy 33 fractions    | 22-pack year (quit for 15 years) | non-drinker                                                     |
| 8       | PR    | 62  | M   | Right Neck | Poorly Differentiated Squamous cell                    | Supraglottic Larynx                                                    | Not reported  | T2 N2c       | Level II         | Cisplatin              | 70gy 33 fractions    | non smoker                       | occasional drinker                                              |
| 9       | CR    | 74  | F   | Right Neck | Squamous cell                                          | Right Tonsil                                                           | p16+          | cT2 N2b      | Level II / III   | No chemo               | 70gy 33 fractions    | non smoker                       | non-drinker                                                     |
| 10      | CR    | 68  | M   | Left Neck  | squamous cell                                          | Left Glossotonsillar Sulcus                                            | p16+          | not reported | Level II / III   | Cisplatin              | 70gy 33 fractions    | 10-pack year                     | 4-5 drinks / week                                               |
| 11      | PR    | 59  | M   | Left Neck  | Squamous cell                                          | Left Tonsil                                                            | p16+          | N2a          | Level II         | Cisplatin              | 70gy 33 fractions    | 45-pack year (quit in 2015)      | 1-2 drinks/ day                                                 |
| 12      | PR    | 57  | M   | Left Neck  | metastatic Squamous cell                               | unknown primary of the left neck                                       | p16+ and p63+ | N2           | Level IIA        | Cisplatin              | 70gy 33 fractions    | 10-pack year                     | occasional drinker                                              |
| 14      | CR    | 52  | M   | Left Neck  | Squamous cell                                          | unknown primary of the left neck                                       | Not reported  | T4bN2c       | Not reported     | No Chemo               | 70gy 33 fractions    | 30 pack/yr                       | 6 per day                                                       |
| 15      | PR    | 55  | M   | Right Neck | Squamous cell                                          | Presented with metastatic SCC - involvement of Naso & Cribriform Plate | Not reported  | T1N2         | Not reported     | Cisplatin              | 70gy 33 fractions    | 10 pack year                     | 4-5 per week                                                    |
| 16      | PR    | 68  | F   | Left Neck  | Squamous cell                                          | Not reported                                                           | Tonsil        | T3N2b        | Not reported     | Cisplatin              | 69.96Gy 33 fractions | 5 pack year                      | 1 per day                                                       |
| 18      | PR    | 61  | M   | Right Neck | Squamous cell                                          | Right Tonsil                                                           | p16+          | cT2 N2b      | Level II and III | Cisplatin              | 69.96Gy 33 fractions | 30-pack year                     | occasional drinker                                              |
| 19      | PR    | 60  | M   | Right Neck | metastatic Squamous cell                               | unknown primary of the Right Neck                                      | p16-          | not reported | Level II / III   | No chemo               | 69.96Gy 33 fractions | 40-pack year                     | previous history of alcohol abuse but discontinued for 25 years |

|    |    |    |   |            |                          |                                            |               |               |                 |                                                      |                      |                                           |                                        |
|----|----|----|---|------------|--------------------------|--------------------------------------------|---------------|---------------|-----------------|------------------------------------------------------|----------------------|-------------------------------------------|----------------------------------------|
| 20 | CR | 70 | M | Right Neck | Squamous cell            | Right Base of Tongue                       | p16+          | T2 N2a        | Level IIa / III | Cisplatin                                            | 69.96Gy 33 fractions | 15-pack year                              | 6-12 beers / week                      |
| 21 | CR | 64 | M | Left Neck  | Squamous cell            | Larynx                                     | not mentioned | T3 N1         | Level III       | Cisplatin                                            | 69.96Gy 33 fractions | 40-pack year                              | occasional drinker                     |
| 22 | PR | 57 | M | Left Neck  | Squamous cell            | Hypopharynx                                | not tested    | T2 N3         | Level II / III  | Cisplatin                                            | 69.96Gy 33 fractions | 80-pack years                             | 10 drinks / day                        |
| 23 | PR | 66 | M | Right Neck | Squamous cell            | Right Tonsil                               | p16+          | T2 N2b        | Level II        | Cisplatin                                            | 69.96Gy 33 fractions | non smoker                                | occasional drinker                     |
| 24 | PR | 73 | M | Right Neck | Metastatic Squamous cell | Larynx                                     | not tested    | T3 N3 M1      | Level II        | No chemo                                             | 69.96Gy 33 fractions | 50-pack year                              | Heavy drinker                          |
| 25 | PR | 60 | M | Left Neck  | Metastatic Squamous cell | Left Glossotonsillar Sulcus Base of Tongue | p16+          | T4 N2b        | Level II        | Cetuximab                                            | 69.96Gy 33 fractions | 6-pack years                              | occasional drinker                     |
| 26 | PR | 40 | M | Right Neck | Squamous cell            | Right Oropharynx                           | Not Reported  | T4b N2c       | Level II        | Cisplatin                                            | 69.96Gy 33 fractions | non-smoker                                | non-drinker                            |
| 27 | PR | 61 | M | Left Neck  | Squamous cell            | Base of Tongue                             | p16+          | not reported  | Level II/ III   | Cisplatin                                            | 69.96Gy 33 fractions | 30-pack year                              | 10 drinks / week                       |
| 28 | PR | 59 | M | Left Neck  | Squamous cell            | Left Oropharynx                            | unclear       | T4 N3 M0      | Level II        | Cisplatin                                            | 69.96Gy 33 fractions | non smoker                                | non-drinker                            |
| 29 | PR | 46 | F | Right Neck | Squamous cell            | Right Tonsil                               | p16+          | T2/T3 N2      | Level II        | Cisplatin                                            | 69.96Gy 33 fractions | 8-pack year (quit 10 yrs ago)             | Not reported                           |
| 30 | CR | 62 | M | Right Neck | squamous cell            | Right Base of Tongue                       | p16+          | T2 N2         | Level Iib       | Cisplatin                                            | 69.96Gy 33 fractions | 20-pack year                              | 6 beers / night                        |
| 31 | CR | 54 | M | Right Neck | Squamous cell            | Aryepiglottic fold                         | p16+          | T2 N2 M0      | Level II/ III   | Cisplatin                                            | 69.96Gy 33 fractions | 10 pack year                              | 2 drinks / day                         |
| 32 | PR | 58 | M | Right Neck | Squamous cell            | Glossotonsillar Sulcus                     | not reported  | not reported  | Level II        | Cisplatin                                            | 69.96Gy 33 fractions | 10-pack year +marijuana (quit 10 yrs ago) | previously drank heavily (quit for 20) |
| 33 | PR | 52 | M | Left Neck  | Squamous cell            | Left Base of Tongue (Tonsillar Base)       | p16+          | not mentioned | Level II/III    | Cisplatin                                            | 69.96Gy 33 fractions | 17-pack year                              | 12-20 beers / weekend for 20 years     |
| 34 | CR | 75 | M | Right Neck | squamous cell            | Posterior Pharyngeal                       | not mentioned | T2 N2a        | Level II        | No chemo                                             | 69.96Gy 33 fractions | former smoker (quit for 50 years)         | 3/ 4 beers / week                      |
| 35 | CR | 71 | M | Right Neck | Squamous cell            | Right tonsillar and Base of tongue         | p16+          | T2 N2b        | Level IIa       | Cisplatin                                            | 69.96Gy 33 fractions | 2nd hand smoke exposure                   | 3-4 glasses of wine / day              |
| 36 | CR | 49 | M | Left Neck  | Squamous cell            | Left Tonsil                                | p16+          | not mentioned | Level II        | No chemo                                             | 69.96Gy 33 fractions | Lifetime non-smoker                       | 4-5 glasses of wine / week             |
| 37 | CR | 67 | M | Right Neck | Squamous cell            | Ipsilateral Nasopharynx base of tongue     | p16+          | T3 N2c        | Level II a/b    | Cisplatin                                            | 69.96Gy 33 fractions | 2 packs a day (quit 1986)                 | Heavy alcohol use (quit 20 yrs ago)    |
| 39 | PR | 59 | M | Right Neck | Squamous cell            | Right Tonsil (Oropharynx)                  | p16+          | T2 N2b        | Level II        | high dose cisplatin (1 cycle) + 2 cycles carboplatin | 69.96Gy 33 fractions | Lifetime non-smoker                       | Lifetime non drinker                   |
| 40 | CR | 51 | M | Right Neck | squamous cell            | BOT                                        | HPV+          | T2N3B         | unknown         | Cisplatin                                            | 69.96Gy 33 fractions | non smoker                                | Socially                               |
| 42 | PR | 64 | M | Left Neck  | Squamous cell            | Base of Tongue                             | p16+          | T2 N2a        | Level IIa       | Cisplatin                                            | 69.96Gy 33 fractions | Ex-smoker quit in 2016 (50-pack-years)    | 26 ounces of rum + beer                |

|    |    |    |   |            |                                                                                       |                                                          |              |               |                   |                                                                                        |                      |                                         |                                 |
|----|----|----|---|------------|---------------------------------------------------------------------------------------|----------------------------------------------------------|--------------|---------------|-------------------|----------------------------------------------------------------------------------------|----------------------|-----------------------------------------|---------------------------------|
| 43 | PR | 51 | M | Right Neck | Squamous cell                                                                         | Base of Tongue                                           | p16+         | not mentioned | Level II          | Cisplatin                                                                              | 69.96Gy 33 fractions | 40-pack-year (quit 2015)                | 10 drinks                       |
| 44 | PR | 61 | M | Right Neck | moderately differentiated Squamous cell                                               | Right Tonsil                                             | p16+         | T1 N2c        | Level IIa         | Cisplatin                                                                              | 69.96Gy 33 fractions | 35-pack-year                            | 5-drinks a day (for years)      |
| 45 | PR | 59 | M | Left Neck  | invasive poorly differentiated Squamous cell                                          | Base of Tongue                                           | p16-         | T4 N3         | Level II and III  | Cisplatin                                                                              | 67.84Gy 32 fractions | Heavy smoker                            | Binge drinker                   |
| 46 | PR | 44 | F | Right Neck | Locally Advanced Squamous cell                                                        | Base of Tongue                                           | Not reported | Not reported  | Level IIA and III | Cisplatin                                                                              | 69.96Gy 33 fractions | 10-pack-year                            | non-drinker                     |
| 47 | PR | 57 | M | Left Neck  | Squamous cell                                                                         | Left Glossotonsillar Sulcus                              | p16+         | T2 N1         | Level IIa         | high dose cisplatin (1 cycle) and 1 cycle Carboplatin (due to tinnitus from cisplatin) | 69.96Gy 33 fractions | 20-pack-year (quit in 1997)             | marijuana 50mg/day, 8-10 drinks |
| 48 | PR | 70 | M | Right Neck | poorly differentiated Squamous cell                                                   | Right Base of Tongue (Oropharynx)                        | p16+         | T2 N2         | Level IIA         | Carboplatin AUC 6 ( due to tinnitus)                                                   | 69.96Gy 33 fractions | 16-pack-year (quit in 1980)             | 2 alcoholic drinks              |
| 49 | PR | 69 | M | Right Neck | poorly differentiated nonkeratinizing Squamous cell                                   | Right Tonsil (Oropharynx)                                | p16+         | Not reported  | Level II          | cisplatin low dose (weekly)                                                            | 69.96Gy 33 fractions | 10-pack-year (quit in 1987)             | < than 1 glass per week         |
| 50 | CR | 63 | M | Right Neck | Squamous cell                                                                         | Right Tonsil                                             | p16+         | T2 N1         | Level II a - b    | Carboplatin AUC 6 ( due to tinnitus)                                                   | 69.96Gy 33 fractions | Lifetime non-smoker                     | once a month                    |
| 51 | PR | 39 | M | Right Neck | metastatic nasopharyngeal carcinoma non keratinizing, undifferentiated (EBV positive) | Nasopharynx                                              | Not reported | IVc           | Level II a - b    | Gemcitabine/Cisplatin (4 cycles) + Cisplatin low dose (8 cycles)                       | 65.72Gy 31 fractions | 10-pack-year                            | non-drinker                     |
| 52 | PR | 63 | M | Right Neck | Invasive Squamous cell                                                                | Right Piriform Fossa and of the Right Aryepiglottic Fold | Not reported | Not reported  | Level II          | Cisplatin                                                                              | 69.96Gy 33 fractions | 45-pack-year (quit June 2017)           | several beers / day             |
| 53 | PR | 65 | M | Left Neck  | Squamous cell                                                                         | Base of Tongue                                           | p16+         | T3 N2         | Level II - III    | Cisplatin                                                                              | 69.96Gy 33 fractions | cigars for 30 years                     | 24 beers / week                 |
| 54 | CR | 50 | M | Left Neck  | Squamous cell                                                                         | Base of Tongue                                           | p16+         | T1 N2b        | Level IIb - III   | Cisplatin                                                                              | 69.96Gy 33 fractions | Lifetime Non-smoker                     | Not specified                   |
| 55 | PR | 79 | M | Left Neck  | Squamous cell                                                                         | Unknown primary of the left neck mass                    | Not reported | Not reported  | Level II          | No chemo                                                                               | 69.90Gy 30 fractions | Lifetime Non-smoker                     | occasional social drinker       |
| 56 | PR | 39 | M | Left Neck  | Poorly differentiated metastatic Squamous cell carcinoma                              | Left Tonsil                                              | p16+         | Not reported  | level II          | Cisplatin                                                                              | 69.96Gy 33 fractions | ex-smoker quit in 2014 (7.5-pack-years) | occasional social drinker       |

|    |    |    |   |            |                                                         |                                  |              |              |                    |             |                      |                                                 |                              |
|----|----|----|---|------------|---------------------------------------------------------|----------------------------------|--------------|--------------|--------------------|-------------|----------------------|-------------------------------------------------|------------------------------|
| 57 | PR | 56 | M | Right Neck | Locally advanced metastatic nasopharyngeal carcinoma    | Nasopharynx                      | EBV positive | T2N1         | Level II - level V | Carboplatin | 69.96Gy 33 fractions | Ex-smoker<br>8 cig / day (quit 15-20 years ago) | 1 glass wine/day             |
| 58 | PR | 58 | M | Right Neck | Invasive squamous cell carcinoma of unknown primary     | unknown primary (suspected BOT)  | Not reported | Not reported | level IIA and B    | Cisplatin   | 69.96Gy 33 fractions | Occasional cigars over 15 years                 | Six to eight drinks per week |
| 59 | CR | 58 | M | Right Neck | Squamous Cell Carcinoma                                 | Base of Tongue                   | p16+         | T4 N2        | level II           | Cisplatin   | 69.96Gy 33 fractions | Never smoked                                    | Not reported                 |
| 60 | CR | 80 | M | Right Neck | Poorly Differentiated Squamous cell carcinoma           | Right Tonsil                     | p16+         | T2 N2        | Level II           | No Chemo    | 69.96Gy 33 fractions | Smoked for 3 years (0.5 to 1 pack per day)      | occasional drinker           |
| 63 | PR | 44 | M | Left Neck  | Squamous cell carcinoma                                 | Mandibular mucosa, left mandible | Not reported | T4 N2c       | Level I - IV       | Cisplatin   | 69.96Gy 33 fractions | Lifetime non-smoker                             | Minimal consumption          |
| 64 | PR | 76 | M | Left Neck  | Squamous cell carcinoma with bilateral neck involvement | Base of Tongue                   | Not reported | T4 N2        | Not reported       | No chemo    | 69.96Gy 33 fractions | Lifetime non-smoker                             | 2-3 drinks/week              |
| 65 | CR | 65 | M | Left Neck  | Squamous cell carcinoma                                 | Base of Tongue                   | Not reported | T4a N2       | Level IIA/III      | Cisplatin   | 69.96Gy 33 fractions | Lifetime non-smoker                             | 3-4 drinks/day               |
| 66 | CR | 47 | M | Left Neck  | Squamous Cell Carcinoma                                 | Oropharynx                       | p16+         | T4           | Not reported       | Cisplatin   | 69.96Gy 33 fractions | Lifetime non-smoker                             | Not reported                 |
| 68 | PR | 61 | F | Left Neck  | Squamous Cell Carcinoma                                 | Nasopharynx                      | Not reported | T4           | Level IIA          | No Chemo    | 69.96Gy 33 fractions | Smoker - 40packs/year                           | Not reported                 |
| 69 | CR | 56 | M | Right Neck | Squamous Cell Carcinoma                                 | Hypopharynx                      | Not reported | T4           | Level IIA+b        | Cisplatin   | 69.96Gy 33 fractions | Smoker - 30packs/year                           | Socially                     |
| 70 | CR | 67 | M | Right Neck | Squamous Cell Carcinoma                                 | Unknown primary                  | p16+         | T0           | N1                 | Cisplatin   | 69.96Gy 33 fractions | Quit smoking (1pack/year for 20 yrs)            | Socially                     |
| 71 | CR | 70 | M | Right Neck | Squamous Cell Carcinoma                                 | Right BOT                        | p16+         | T4           | N1                 | Cisplatin   | 69.96Gy 33 fractions | Quit smoking (50pack/year)                      | Socially                     |
| 73 | CR | 71 | M | Right Neck | Squamous Cell Carcinoma                                 | Supraglottic laryngeal           | Not reported | T3           | N2c                | Cisplatin   | 70Gy 35 fractions    | non-smoker                                      | non-alcoholic                |
| 74 | PR | 78 | M | Right Neck | Squamous Cell Carcinoma                                 | Right Tonsillar                  | p16+         | T2           | N1                 | Cisplatin   | 69.96Gy 33 fractions | non-smoker                                      | non-alcoholic                |
| 75 | CR | 68 | M | Right Neck | Squamous Cell Carcinoma                                 | Right soft palate                | p16+         | Not reported | Not reported       | Cisplatin   | 69.96Gy 33 fractions | Smoker (45 pack/year)                           | non-alcoholic                |
| 76 | PR | 65 | M | Right Neck | Squamous Cell Carcinoma                                 | Oropharynx                       | p16+         | T2           | N1                 | Cisplatin   | 70Gy 35 fractions    | Smoker (2 pack/year)                            | 18 glasses per week          |
| 77 | PR | 53 | M | Right Neck | Squamous Cell Carcinoma                                 | Oropharynx                       | Not Reported | T0/N3        | L11                | Cisplatin   | 70Gy 33 fractions    | 1/4 pack/day since age                          | non-alcoholic                |

|    |    |    |   |            |                                    |                    |                   |                   |                    |                          |                      |                                                       |                      |
|----|----|----|---|------------|------------------------------------|--------------------|-------------------|-------------------|--------------------|--------------------------|----------------------|-------------------------------------------------------|----------------------|
|    |    |    |   |            |                                    |                    |                   |                   |                    |                          |                      | of 20 - quit<br>two weeks<br>ago                      |                      |
| 78 | PR | 36 | M | Right Neck | Nasopharyn-<br>geal Carci-<br>noma | Not re-<br>ported  | EBV<br>positive   | Not re-<br>ported | Level IIA<br>& IIB | Cisplatin (high<br>dose) | 70Gy 33<br>fractions | Ex-smoker<br>(2<br>packs/year<br>-quit 1<br>year ago) | non-alcoholic        |
| 79 | PR | 55 | M | Right neck | Squamous<br>cell carci-<br>noma    | Base of<br>tongue  | p16+              | T4                | N2                 | Cisplatin                | 70Gy 33<br>fractions | Non-<br>smoker                                        | non-alcoholic        |
| 80 | PR | 67 | M | Left Neck  | Squamous<br>cell carci-<br>noma    | Unknown<br>primary | Not re-<br>ported | Not re-<br>ported | Level IIB          | Carboplatin              | 70Gy 33<br>fractions | Non-<br>smoker                                        | 4 drinks per<br>week |
